# Supplementary material for: Extreme primary and secondary protein structure variability in the chimeric male-transmitted cytochrome c oxidase subunit II protein in freshwater mussels: Evidence for an elevated amino acid substitution rate in the face of domain-specific purifying selection
Source: PubMed Central journal article supplement (PMC2430956; doi:10.1186/1471-2148-8-165), 2008-05-31
Supplement: 1471-2148-8-165-S2.pdf [file 1471-2148-8-165-S2.pdf]

**Additional Table 2.** Pair-wise Tamura-Nei-corrected nucleotide (nu) and Poisson-corrected amino acid (aa) distances  $\pm$  standard error (SE) for the taxa appearing in Table 1. Blocks 1 and 2: *MCOX2h+COXI* in lower left and *FCOX2h+COXI* in upper right. Blocks 3 and 4 are *MCOX2e*.

Block 1:

|                       | <i>L.straminea</i> | <i>L.hydiana</i>  | <i>A.ligamentina</i> | <i>L.ovata</i>    | <i>H.subangulata</i> | <i>V.ellipsiformis</i> | <i>O.olivaria</i> | <i>P.fasciolaris</i> | <i>L.rimosus</i>  | <i>C.tampicoensis</i> | <i>G.rotundata</i> |
|-----------------------|--------------------|-------------------|----------------------|-------------------|----------------------|------------------------|-------------------|----------------------|-------------------|-----------------------|--------------------|
| <i>L.str</i> (nuSE)   | -                  | 0.034 $\pm$ 0.008 | 0.080 $\pm$ 0.012    | 0.081 $\pm$ 0.013 | 0.097 $\pm$ 0.014    | 0.086 $\pm$ 0.013      | 0.079 $\pm$ 0.013 | 0.104 $\pm$ 0.015    | 0.122 $\pm$ 0.016 | 0.141 $\pm$ 0.018     | 0.108 $\pm$ 0.014  |
| (aaSE)                | -                  | 0 $\pm$ 0         | 0.005 $\pm$ 0.005    | 0.005 $\pm$ 0.005 | 0.016 $\pm$ 0.009    | 0.005 $\pm$ 0.005      | 0.016 $\pm$ 0.009 | 0.016 $\pm$ 0.009    | 0.016 $\pm$ 0.009 | 0.011 $\pm$ 0.007     | 0.005 $\pm$ 0.005  |
| <i>L.hyd</i> (nuSE)   | 0.013 $\pm$ 0.004  | -                 | 0.086 $\pm$ 0.013    | 0.099 $\pm$ 0.015 | 0.096 $\pm$ 0.014    | 0.108 $\pm$ 0.015      | 0.094 $\pm$ 0.015 | 0.113 $\pm$ 0.016    | 0.117 $\pm$ 0.016 | 0.135 $\pm$ 0.017     | 0.121 $\pm$ 0.015  |
| (aaSE)                | 0.003 $\pm$ 0.003  | -                 | 0.005 $\pm$ 0.005    | 0.005 $\pm$ 0.005 | 0.016 $\pm$ 0.009    | 0.005 $\pm$ 0.005      | 0.016 $\pm$ 0.009 | 0.016 $\pm$ 0.009    | 0.016 $\pm$ 0.009 | 0.011 $\pm$ 0.007     | 0.005 $\pm$ 0.005  |
| <i>A.lig</i> (nuSE)   | 0.049 $\pm$ 0.008  | 0.053 $\pm$ 0.008 | -                    | 0.095 $\pm$ 0.013 | 0.099 $\pm$ 0.015    | 0.099 $\pm$ 0.014      | 0.090 $\pm$ 0.013 | 0.116 $\pm$ 0.016    | 0.121 $\pm$ 0.015 | 0.136 $\pm$ 0.016     | 0.134 $\pm$ 0.016  |
| (aaSE)                | 0.010 $\pm$ 0.006  | 0.014 $\pm$ 0.007 | -                    | 0 $\pm$ 0         | 0.011 $\pm$ 0.007    | 0 $\pm$ 0              | 0.011 $\pm$ 0.008 | 0.021 $\pm$ 0.010    | 0.011 $\pm$ 0.007 | 0.005 $\pm$ 0.005     | 0 $\pm$ 0          |
| <i>L.ovata</i> (nuSE) | 0.114 $\pm$ 0.012  | 0.116 $\pm$ 0.013 | 0.103 $\pm$ 0.012    | -                 | 0.103 $\pm$ 0.015    | 0.102 $\pm$ 0.014      | 0.099 $\pm$ 0.014 | 0.118 $\pm$ 0.017    | 0.100 $\pm$ 0.015 | 0.131 $\pm$ 0.017     | 0.118 $\pm$ 0.015  |
| (aaSE)                | 0.028 $\pm$ 0.009  | 0.031 $\pm$ 0.010 | 0.024 $\pm$ 0.009    | -                 | 0.011 $\pm$ 0.007    | 0 $\pm$ 0              | 0.011 $\pm$ 0.008 | 0.021 $\pm$ 0.010    | 0.011 $\pm$ 0.007 | 0.005 $\pm$ 0.005     | 0 $\pm$ 0          |
| <i>H.sub</i> (nuSE)   | 0.110 $\pm$ 0.013  | 0.112 $\pm$ 0.013 | 0.090 $\pm$ 0.011    | 0.109 $\pm$ 0.012 | -                    | 0.098 $\pm$ 0.014      | 0.091 $\pm$ 0.013 | 0.120 $\pm$ 0.016    | 0.140 $\pm$ 0.018 | 0.106 $\pm$ 0.015     | 0.138 $\pm$ 0.016  |
| (aaSE)                | 0.042 $\pm$ 0.011  | 0.038 $\pm$ 0.011 | 0.038 $\pm$ 0.011    | 0.038 $\pm$ 0.011 | -                    | 0.011 $\pm$ 0.007      | 0.021 $\pm$ 0.011 | 0.032 $\pm$ 0.013    | 0.021 $\pm$ 0.010 | 0.016 $\pm$ 0.009     | 0.011 $\pm$ 0.007  |
| <i>V.ell</i> (nuSE)   | 0.149 $\pm$ 0.015  | 0.148 $\pm$ 0.015 | 0.128 $\pm$ 0.013    | 0.160 $\pm$ 0.015 | 0.133 $\pm$ 0.013    | -                      | 0.059 $\pm$ 0.010 | 0.126 $\pm$ 0.017    | 0.137 $\pm$ 0.017 | 0.124 $\pm$ 0.016     | 0.111 $\pm$ 0.014  |
| (aaSE)                | 0.093 $\pm$ 0.018  | 0.089 $\pm$ 0.018 | 0.081 $\pm$ 0.017    | 0.085 $\pm$ 0.018 | 0.096 $\pm$ 0.018    | -                      | 0.011 $\pm$ 0.008 | 0.021 $\pm$ 0.010    | 0.011 $\pm$ 0.007 | 0.005 $\pm$ 0.005     | 0 $\pm$ 0          |
| <i>O.oli</i> (nuSE)   | 0.139 $\pm$ 0.014  | 0.138 $\pm$ 0.014 | 0.121 $\pm$ 0.013    | 0.148 $\pm$ 0.015 | 0.124 $\pm$ 0.013    | 0.046 $\pm$ 0.007      | -                 | 0.105 $\pm$ 0.016    | 0.125 $\pm$ 0.016 | 0.138 $\pm$ 0.018     | 0.115 $\pm$ 0.014  |
| (aaSE)                | 0.074 $\pm$ 0.016  | 0.070 $\pm$ 0.016 | 0.063 $\pm$ 0.014    | 0.067 $\pm$ 0.015 | 0.078 $\pm$ 0.016    | 0.021 $\pm$ 0.009      | -                 | 0.032 $\pm$ 0.013    | 0.021 $\pm$ 0.010 | 0.016 $\pm$ 0.009     | 0.011 $\pm$ 0.008  |
| <i>P.fas</i> (nuSE)   | 0.163 $\pm$ 0.016  | 0.168 $\pm$ 0.016 | 0.179 $\pm$ 0.017    | 0.178 $\pm$ 0.017 | 0.163 $\pm$ 0.016    | 0.181 $\pm$ 0.017      | 0.182 $\pm$ 0.016 | -                    | 0.120 $\pm$ 0.017 | 0.121 $\pm$ 0.016     | 0.119 $\pm$ 0.016  |
| (aaSE)                | 0.127 $\pm$ 0.022  | 0.123 $\pm$ 0.021 | 0.123 $\pm$ 0.022    | 0.119 $\pm$ 0.020 | 0.111 $\pm$ 0.020    | 0.146 $\pm$ 0.023      | 0.131 $\pm$ 0.021 | -                    | 0.032 $\pm$ 0.013 | 0.016 $\pm$ 0.009     | 0.021 $\pm$ 0.010  |
| <i>L.rim</i> (nuSE)   | 0.186 $\pm$ 0.017  | 0.187 $\pm$ 0.017 | 0.193 $\pm$ 0.018    | 0.194 $\pm$ 0.018 | 0.175 $\pm$ 0.017    | 0.192 $\pm$ 0.017      | 0.189 $\pm$ 0.017 | 0.105 $\pm$ 0.012    | -                 | 0.158 $\pm$ 0.019     | 0.134 $\pm$ 0.016  |
| (aaSE)                | 0.135 $\pm$ 0.022  | 0.131 $\pm$ 0.022 | 0.131 $\pm$ 0.022    | 0.131 $\pm$ 0.022 | 0.108 $\pm$ 0.021    | 0.150 $\pm$ 0.023      | 0.135 $\pm$ 0.022 | 0.056 $\pm$ 0.013    | -                 | 0.016 $\pm$ 0.009     | 0.011 $\pm$ 0.007  |
| <i>C.tam</i> (nuSE)   | 0.187 $\pm$ 0.017  | 0.184 $\pm$ 0.017 | 0.175 $\pm$ 0.016    | 0.188 $\pm$ 0.017 | 0.151 $\pm$ 0.014    | 0.175 $\pm$ 0.016      | 0.171 $\pm$ 0.016 | 0.154 $\pm$ 0.014    | 0.184 $\pm$ 0.017 | -                     | 0.108 $\pm$ 0.015  |
| (aaSE)                | 0.119 $\pm$ 0.020  | 0.115 $\pm$ 0.020 | 0.115 $\pm$ 0.020    | 0.119 $\pm$ 0.020 | 0.111 $\pm$ 0.020    | 0.142 $\pm$ 0.022      | 0.131 $\pm$ 0.021 | 0.108 $\pm$ 0.019    | 0.123 $\pm$ 0.021 | -                     | 0.005 $\pm$ 0.005  |
| <i>G.rot</i> (nuSE)   | 0.188 $\pm$ 0.018  | 0.186 $\pm$ 0.018 | 0.181 $\pm$ 0.018    | 0.194 $\pm$ 0.018 | 0.162 $\pm$ 0.015    | 0.188 $\pm$ 0.017      | 0.190 $\pm$ 0.018 | 0.169 $\pm$ 0.016    | 0.169 $\pm$ 0.016 | 0.126 $\pm$ 0.014     | -                  |
| (aaSE)                | 0.093 $\pm$ 0.019  | 0.089 $\pm$ 0.018 | 0.089 $\pm$ 0.019    | 0.093 $\pm$ 0.018 | 0.089 $\pm$ 0.017    | 0.119 $\pm$ 0.020      | 0.104 $\pm$ 0.019 | 0.085 $\pm$ 0.017    | 0.100 $\pm$ 0.019 | 0.056 $\pm$ 0.013     | -                  |
| <i>O.ref</i> (nuSE)   | 0.173 $\pm$ 0.018  | 0.175 $\pm$ 0.018 | 0.173 $\pm$ 0.017    | 0.172 $\pm$ 0.017 | 0.148 $\pm$ 0.015    | 0.190 $\pm$ 0.019      | 0.182 $\pm$ 0.018 | 0.166 $\pm$ 0.016    | 0.170 $\pm$ 0.017 | 0.153 $\pm$ 0.015     | 0.146 $\pm$ 0.015  |
| (aaSE)                | 0.111 $\pm$ 0.020  | 0.115 $\pm$ 0.020 | 0.108 $\pm$ 0.019    | 0.108 $\pm$ 0.019 | 0.111 $\pm$ 0.019    | 0.142 $\pm$ 0.022      | 0.127 $\pm$ 0.021 | 0.123 $\pm$ 0.021    | 0.127 $\pm$ 0.021 | 0.119 $\pm$ 0.020     | 0.104 $\pm$ 0.019  |
| <i>T.liv</i> (nuSE)   | 0.188 $\pm$ 0.017  | 0.184 $\pm$ 0.017 | 0.201 $\pm$ 0.018    | 0.192 $\pm$ 0.017 | 0.176 $\pm$ 0.016    | 0.196 $\pm$ 0.017      | 0.195 $\pm$ 0.018 | 0.162 $\pm$ 0.015    | 0.162 $\pm$ 0.015 | 0.156 $\pm$ 0.015     | 0.178 $\pm$ 0.018  |
| (aaSE)                | 0.119 $\pm$ 0.020  | 0.123 $\pm$ 0.020 | 0.115 $\pm$ 0.020    | 0.111 $\pm$ 0.019 | 0.108 $\pm$ 0.019    | 0.142 $\pm$ 0.022      | 0.123 $\pm$ 0.020 | 0.096 $\pm$ 0.017    | 0.108 $\pm$ 0.018 | 0.115 $\pm$ 0.019     | 0.093 $\pm$ 0.016  |
| <i>P.pop</i> (nuSE)   | 0.219 $\pm$ 0.018  | 0.214 $\pm$ 0.017 | 0.201 $\pm$ 0.017    | 0.236 $\pm$ 0.018 | 0.198 $\pm$ 0.017    | 0.217 $\pm$ 0.018      | 0.219 $\pm$ 0.018 | 0.216 $\pm$ 0.018    | 0.224 $\pm$ 0.018 | 0.210 $\pm$ 0.018     | 0.207 $\pm$ 0.017  |
| (aaSE)                | 0.162 $\pm$ 0.024  | 0.158 $\pm$ 0.024 | 0.158 $\pm$ 0.025    | 0.162 $\pm$ 0.025 | 0.154 $\pm$ 0.024    | 0.191 $\pm$ 0.027      | 0.174 $\pm$ 0.025 | 0.158 $\pm$ 0.023    | 0.162 $\pm$ 0.023 | 0.162 $\pm$ 0.024     | 0.150 $\pm$ 0.023  |
| <i>P.dom</i> (nuSE)   | 0.242 $\pm$ 0.020  | 0.246 $\pm$ 0.020 | 0.232 $\pm$ 0.020    | 0.243 $\pm$ 0.021 | 0.224 $\pm$ 0.019    | 0.247 $\pm$ 0.020      | 0.243 $\pm$ 0.020 | 0.222 $\pm$ 0.019    | 0.231 $\pm$ 0.020 | 0.203 $\pm$ 0.018     | 0.208 $\pm$ 0.018  |
| (aaSE)                | 0.174 $\pm$ 0.025  | 0.178 $\pm$ 0.025 | 0.170 $\pm$ 0.024    | 0.170 $\pm$ 0.024 | 0.182 $\pm$ 0.026    | 0.220 $\pm$ 0.029      | 0.203 $\pm$ 0.027 | 0.170 $\pm$ 0.025    | 0.203 $\pm$ 0.027 | 0.150 $\pm$ 0.023     | 0.158 $\pm$ 0.023  |
| <i>A.pli</i> (nuSE)   | 0.219 $\pm$ 0.019  | 0.219 $\pm$ 0.019 | 0.228 $\pm$ 0.020    | 0.240 $\pm$ 0.020 | 0.199 $\pm$ 0.018    | 0.230 $\pm$ 0.020      | 0.234 $\pm$ 0.020 | 0.199 $\pm$ 0.018    | 0.199 $\pm$ 0.018 | 0.171 $\pm$ 0.016     | 0.194 $\pm$ 0.018  |
| (aaSE)                | 0.146 $\pm$ 0.021  | 0.142 $\pm$ 0.021 | 0.142 $\pm$ 0.021    | 0.135 $\pm$ 0.021 | 0.123 $\pm$ 0.020    | 0.182 $\pm$ 0.025      | 0.166 $\pm$ 0.023 | 0.138 $\pm$ 0.022    | 0.146 $\pm$ 0.023 | 0.142 $\pm$ 0.021     | 0.135 $\pm$ 0.020  |
| <i>P.sin</i> (nuSE)   | 0.210 $\pm$ 0.017  | 0.216 $\pm$ 0.018 | 0.212 $\pm$ 0.017    | 0.227 $\pm$ 0.018 | 0.214 $\pm$ 0.017    | 0.232 $\pm$ 0.019      | 0.238 $\pm$ 0.019 | 0.227 $\pm$ 0.018    | 0.230 $\pm$ 0.019 | 0.221 $\pm$ 0.019     | 0.232 $\pm$ 0.020  |
| (aaSE)                | 0.170 $\pm$ 0.023  | 0.166 $\pm$ 0.023 | 0.166 $\pm$ 0.024    | 0.166 $\pm$ 0.024 | 0.162 $\pm$ 0.023    | 0.195 $\pm$ 0.027      | 0.182 $\pm$ 0.025 | 0.186 $\pm$ 0.025    | 0.191 $\pm$ 0.025 | 0.174 $\pm$ 0.023     | 0.174 $\pm$ 0.024  |
| <i>F.flu</i> (nuSE)   | 0.238 $\pm$ 0.019  | 0.236 $\pm$ 0.019 | 0.223 $\pm$ 0.018    | 0.254 $\pm$ 0.020 | 0.211 $\pm$ 0.018    | 0.253 $\pm$ 0.021      | 0.241 $\pm$ 0.020 | 0.235 $\pm$ 0.020    | 0.231 $\pm$ 0.019 | 0.216 $\pm$ 0.019     | 0.217 $\pm$ 0.020  |
| (aaSE)                | 0.174 $\pm$ 0.024  | 0.170 $\pm$ 0.023 | 0.170 $\pm$ 0.024    | 0.166 $\pm$ 0.024 | 0.158 $\pm$ 0.023    | 0.195 $\pm$ 0.026      | 0.182 $\pm$ 0.025 | 0.182 $\pm$ 0.025    | 0.191 $\pm$ 0.026 | 0.178 $\pm$ 0.024     | 0.170 $\pm$ 0.024  |
| <i>Q.qua</i> (nuSE)   | 0.222 $\pm$ 0.018  | 0.224 $\pm$ 0.018 | 0.221 $\pm$ 0.018    | 0.243 $\pm$ 0.020 | 0.221 $\pm$ 0.019    | 0.259 $\pm$ 0.022      | 0.253 $\pm$ 0.022 | 0.235 $\pm$ 0.019    | 0.260 $\pm$ 0.021 | 0.236 $\pm$ 0.019     | 0.236 $\pm$ 0.020  |
| (aaSE)                | 0.174 $\pm$ 0.025  | 0.170 $\pm$ 0.025 | 0.170 $\pm$ 0.025    | 0.170 $\pm$ 0.025 | 0.174 $\pm$ 0.025    | 0.207 $\pm$ 0.029      | 0.186 $\pm$ 0.027 | 0.178 $\pm$ 0.026    | 0.199 $\pm$ 0.027 | 0.170 $\pm$ 0.025     | 0.170 $\pm$ 0.025  |
| <i>Q.ref</i> (nuSE)   | 0.214 $\pm$ 0.018  | 0.219 $\pm$ 0.019 | 0.219 $\pm$ 0.018    | 0.243 $\pm$ 0.020 | 0.208 $\pm$ 0.018    | 0.239 $\pm$ 0.020      | 0.233 $\pm$ 0.020 | 0.224 $\pm$ 0.019    | 0.254 $\pm$ 0.021 | 0.217 $\pm$ 0.018     | 0.254 $\pm$ 0.022  |
| (aaSE)                | 0.162 $\pm$ 0.024  | 0.166 $\pm$ 0.024 | 0.158 $\pm$ 0.024    | 0.166 $\pm$ 0.025 | 0.170 $\pm$ 0.025    | 0.207 $\pm$ 0.028      | 0.186 $\pm$ 0.026 | 0.191 $\pm$ 0.028    | 0.203 $\pm$ 0.027 | 0.174 $\pm$ 0.026     | 0.174 $\pm$ 0.026  |
| <i>I.jap</i> (nuSE)   | 0.313 $\pm$ 0.024  | 0.316 $\pm$ 0.023 | 0.304 $\pm$ 0.023    | 0.287 $\pm$ 0.022 | 0.299 $\pm$ 0.023    | 0.303 $\pm$ 0.023      | 0.286 $\pm$ 0.021 | 0.301 $\pm$ 0.022    | 0.322 $\pm$ 0.025 | 0.280 $\pm$ 0.021     | 0.298 $\pm$ 0.023  |
| (aaSE)                | 0.237 $\pm$ 0.030  | 0.241 $\pm$ 0.030 | 0.241 $\pm$ 0.030    | 0.228 $\pm$ 0.029 | 0.233 $\pm$ 0.030    | 0.259 $\pm$ 0.032      | 0.246 $\pm$ 0.031 | 0.246 $\pm$ 0.030    | 0.254 $\pm$ 0.031 | 0.220 $\pm$ 0.028     | 0.220 $\pm$ 0.028  |

## Additional file 2 (continued).

### Block 2:

| Male          | O.reflexa     | T.lividus     | P.popei       | P.dombeyanus  | A.plicata     | P.sintoxia    | F.flava       | Q.quadrula    | Q.refulgens   | I.japanensis  |
|---------------|---------------|---------------|---------------|---------------|---------------|---------------|---------------|---------------|---------------|---------------|
| L.str (nutSE) | 0.101 ± 0.015 | 0.132 ± 0.018 | 0.156 ± 0.020 | 0.131 ± 0.018 | 0.127 ± 0.017 | 0.165 ± 0.020 | 0.151 ± 0.019 | 0.147 ± 0.018 | 0.155 ± 0.017 | 0.192 ± 0.020 |
| (aatSE)       | 0.005 ± 0.005 | 0.011 ± 0.007 | 0.011 ± 0.007 | 0.021 ± 0.010 | 0.005 ± 0.005 | 0.021 ± 0.010 | 0.011 ± 0.008 | 0.011 ± 0.007 | 0.016 ± 0.009 | 0.016 ± 0.009 |
| L.hyd (nutSE) | 0.123 ± 0.017 | 0.149 ± 0.020 | 0.151 ± 0.019 | 0.131 ± 0.017 | 0.129 ± 0.017 | 0.162 ± 0.020 | 0.150 ± 0.019 | 0.144 ± 0.017 | 0.155 ± 0.018 | 0.196 ± 0.021 |
| (aatSE)       | 0.005 ± 0.005 | 0.011 ± 0.007 | 0.011 ± 0.007 | 0.021 ± 0.010 | 0.005 ± 0.005 | 0.021 ± 0.010 | 0.011 ± 0.008 | 0.011 ± 0.007 | 0.016 ± 0.009 | 0.016 ± 0.009 |
| A.lig (nutSE) | 0.105 ± 0.014 | 0.128 ± 0.016 | 0.136 ± 0.017 | 0.129 ± 0.017 | 0.133 ± 0.017 | 0.136 ± 0.017 | 0.151 ± 0.018 | 0.144 ± 0.016 | 0.147 ± 0.017 | 0.182 ± 0.019 |
| (aatSE)       | 0 ± 0         | 0.005 ± 0.005 | 0.005 ± 0.005 | 0.016 ± 0.009 | 0 ± 0         | 0.016 ± 0.009 | 0.005 ± 0.005 | 0.005 ± 0.005 | 0.011 ± 0.007 | 0.011 ± 0.007 |
| L.ova (nutSE) | 0.032 ± 0.007 | 0.111 ± 0.015 | 0.151 ± 0.019 | 0.139 ± 0.019 | 0.132 ± 0.017 | 0.154 ± 0.019 | 0.152 ± 0.019 | 0.161 ± 0.019 | 0.149 ± 0.018 | 0.187 ± 0.020 |
| (aatSE)       | 0 ± 0         | 0.005 ± 0.005 | 0.005 ± 0.005 | 0.016 ± 0.009 | 0 ± 0         | 0.016 ± 0.009 | 0.005 ± 0.005 | 0.005 ± 0.005 | 0.011 ± 0.007 | 0.011 ± 0.007 |
| H.sub (nutSE) | 0.112 ± 0.016 | 0.126 ± 0.017 | 0.160 ± 0.020 | 0.118 ± 0.015 | 0.123 ± 0.015 | 0.136 ± 0.016 | 0.133 ± 0.016 | 0.150 ± 0.018 | 0.153 ± 0.018 | 0.183 ± 0.020 |
| (aatSE)       | 0.011 ± 0.007 | 0.016 ± 0.009 | 0.016 ± 0.009 | 0.005 ± 0.005 | 0.011 ± 0.007 | 0.027 ± 0.012 | 0.016 ± 0.009 | 0.016 ± 0.008 | 0.021 ± 0.010 | 0.021 ± 0.010 |
| V.ell (nutSE) | 0.107 ± 0.015 | 0.128 ± 0.017 | 0.161 ± 0.020 | 0.136 ± 0.016 | 0.140 ± 0.018 | 0.163 ± 0.020 | 0.138 ± 0.017 | 0.162 ± 0.019 | 0.141 ± 0.017 | 0.176 ± 0.019 |
| (aatSE)       | 0 ± 0         | 0.005 ± 0.005 | 0.005 ± 0.005 | 0.016 ± 0.009 | 0 ± 0         | 0.016 ± 0.009 | 0.005 ± 0.005 | 0.005 ± 0.005 | 0.011 ± 0.007 | 0.011 ± 0.007 |
| O.oli (nutSE) | 0.113 ± 0.016 | 0.136 ± 0.018 | 0.170 ± 0.021 | 0.124 ± 0.016 | 0.133 ± 0.018 | 0.160 ± 0.019 | 0.151 ± 0.019 | 0.160 ± 0.019 | 0.147 ± 0.018 | 0.182 ± 0.020 |
| (aatSE)       | 0.011 ± 0.008 | 0.016 ± 0.009 | 0.016 ± 0.009 | 0.027 ± 0.012 | 0.011 ± 0.008 | 0.027 ± 0.012 | 0.016 ± 0.010 | 0.016 ± 0.009 | 0.021 ± 0.011 | 0.021 ± 0.011 |
| P.fas (nutSE) | 0.128 ± 0.018 | 0.142 ± 0.017 | 0.152 ± 0.018 | 0.151 ± 0.020 | 0.124 ± 0.016 | 0.141 ± 0.017 | 0.137 ± 0.016 | 0.168 ± 0.020 | 0.156 ± 0.018 | 0.178 ± 0.019 |
| (aatSE)       | 0.021 ± 0.010 | 0.027 ± 0.011 | 0.027 ± 0.011 | 0.037 ± 0.014 | 0.021 ± 0.010 | 0.016 ± 0.009 | 0.027 ± 0.011 | 0.027 ± 0.011 | 0.032 ± 0.012 | 0.021 ± 0.010 |
| L.rim (nutSE) | 0.115 ± 0.016 | 0.145 ± 0.017 | 0.167 ± 0.019 | 0.144 ± 0.017 | 0.148 ± 0.018 | 0.162 ± 0.019 | 0.162 ± 0.019 | 0.192 ± 0.022 | 0.171 ± 0.019 | 0.197 ± 0.021 |
| (aatSE)       | 0.011 ± 0.007 | 0.016 ± 0.009 | 0.016 ± 0.009 | 0.027 ± 0.011 | 0.011 ± 0.007 | 0.027 ± 0.011 | 0.016 ± 0.009 | 0.016 ± 0.009 | 0.021 ± 0.010 | 0.021 ± 0.010 |
| C.tam (nutSE) | 0.129 ± 0.017 | 0.120 ± 0.015 | 0.132 ± 0.016 | 0.144 ± 0.017 | 0.140 ± 0.017 | 0.137 ± 0.017 | 0.136 ± 0.016 | 0.140 ± 0.018 | 0.129 ± 0.016 | 0.180 ± 0.019 |
| (aatSE)       | 0.005 ± 0.005 | 0.011 ± 0.007 | 0.011 ± 0.007 | 0.021 ± 0.010 | 0.005 ± 0.005 | 0.021 ± 0.010 | 0.011 ± 0.008 | 0.011 ± 0.007 | 0.016 ± 0.009 | 0.005 ± 0.005 |
| G.rot (nutSE) | 0.128 ± 0.016 | 0.133 ± 0.017 | 0.147 ± 0.019 | 0.134 ± 0.017 | 0.128 ± 0.017 | 0.149 ± 0.018 | 0.132 ± 0.016 | 0.120 ± 0.016 | 0.140 ± 0.018 | 0.178 ± 0.019 |
| (aatSE)       | 0 ± 0         | 0.005 ± 0.005 | 0.005 ± 0.005 | 0.016 ± 0.009 | 0 ± 0         | 0.016 ± 0.009 | 0.005 ± 0.005 | 0.005 ± 0.005 | 0.011 ± 0.007 | 0.011 ± 0.007 |
| O.ref (nutSE) | -             | 0.106 ± 0.014 | 0.156 ± 0.020 | 0.136 ± 0.018 | 0.140 ± 0.018 | 0.145 ± 0.018 | 0.168 ± 0.021 | 0.146 ± 0.018 | 0.159 ± 0.019 | 0.179 ± 0.020 |
| (aatSE)       | -             | 0.005 ± 0.005 | 0.005 ± 0.005 | 0.016 ± 0.009 | 0 ± 0         | 0.016 ± 0.009 | 0.005 ± 0.005 | 0.005 ± 0.005 | 0.011 ± 0.007 | 0.011 ± 0.007 |
| T.liv (nutSE) | 0.153 ± 0.015 | -             | 0.137 ± 0.018 | 0.144 ± 0.018 | 0.128 ± 0.017 | 0.146 ± 0.020 | 0.150 ± 0.019 | 0.155 ± 0.017 | 0.161 ± 0.018 | 0.173 ± 0.019 |
| (aatSE)       | 0.093 ± 0.017 | -             | 0.011 ± 0.007 | 0.021 ± 0.010 | 0.005 ± 0.005 | 0.021 ± 0.010 | 0.011 ± 0.008 | 0.011 ± 0.007 | 0.016 ± 0.009 | 0.016 ± 0.008 |
| P.pop (nutSE) | 0.200 ± 0.018 | 0.203 ± 0.017 | -             | 0.177 ± 0.020 | 0.121 ± 0.015 | 0.159 ± 0.019 | 0.182 ± 0.020 | 0.157 ± 0.018 | 0.163 ± 0.019 | 0.197 ± 0.021 |
| (aatSE)       | 0.166 ± 0.023 | 0.119 ± 0.020 | -             | 0.021 ± 0.010 | 0.005 ± 0.005 | 0.021 ± 0.010 | 0.011 ± 0.007 | 0.011 ± 0.007 | 0.016 ± 0.009 | 0.016 ± 0.009 |
| P.dom (nutSE) | 0.198 ± 0.019 | 0.194 ± 0.017 | 0.220 ± 0.019 | -             | 0.150 ± 0.019 | 0.157 ± 0.020 | 0.153 ± 0.019 | 0.141 ± 0.017 | 0.156 ± 0.018 | 0.193 ± 0.021 |
| (aatSE)       | 0.170 ± 0.024 | 0.135 ± 0.021 | 0.166 ± 0.025 | -             | 0.016 ± 0.009 | 0.032 ± 0.013 | 0.021 ± 0.010 | 0.021 ± 0.010 | 0.027 ± 0.011 | 0.027 ± 0.011 |
| A.pli (nutSE) | 0.182 ± 0.017 | 0.168 ± 0.016 | 0.211 ± 0.018 | 0.185 ± 0.017 | -             | 0.140 ± 0.018 | 0.128 ± 0.017 | 0.135 ± 0.017 | 0.148 ± 0.018 | 0.181 ± 0.020 |
| (aatSE)       | 0.131 ± 0.020 | 0.096 ± 0.017 | 0.123 ± 0.020 | 0.123 ± 0.021 | -             | 0.016 ± 0.009 | 0.005 ± 0.005 | 0.005 ± 0.005 | 0.011 ± 0.007 | 0.011 ± 0.007 |
| P.sin (nutSE) | 0.213 ± 0.018 | 0.199 ± 0.018 | 0.241 ± 0.019 | 0.209 ± 0.018 | 0.184 ± 0.017 | -             | 0.077 ± 0.013 | 0.158 ± 0.019 | 0.148 ± 0.018 | 0.166 ± 0.020 |
| (aatSE)       | 0.154 ± 0.022 | 0.142 ± 0.021 | 0.174 ± 0.024 | 0.150 ± 0.023 | 0.123 ± 0.020 | -             | 0.011 ± 0.007 | 0.021 ± 0.010 | 0.016 ± 0.009 | 0.027 ± 0.011 |
| F.fla (nutSE) | 0.217 ± 0.018 | 0.213 ± 0.019 | 0.228 ± 0.018 | 0.220 ± 0.019 | 0.198 ± 0.018 | 0.100 ± 0.011 | -             | 0.154 ± 0.019 | 0.139 ± 0.016 | 0.159 ± 0.018 |
| (aatSE)       | 0.158 ± 0.023 | 0.131 ± 0.020 | 0.174 ± 0.024 | 0.170 ± 0.025 | 0.119 ± 0.021 | 0.049 ± 0.013 | -             | 0.011 ± 0.007 | 0.005 ± 0.005 | 0.016 ± 0.009 |
| Q.qua (nutSE) | 0.216 ± 0.018 | 0.226 ± 0.019 | 0.217 ± 0.017 | 0.220 ± 0.019 | 0.208 ± 0.017 | 0.189 ± 0.017 | 0.191 ± 0.017 | -             | 0.117 ± 0.018 | 0.173 ± 0.020 |
| (aatSE)       | 0.170 ± 0.024 | 0.138 ± 0.021 | 0.174 ± 0.024 | 0.138 ± 0.023 | 0.138 ± 0.022 | 0.096 ± 0.019 | 0.108 ± 0.020 | -             | 0.005 ± 0.005 | 0.016 ± 0.009 |
| Q.ref (nutSE) | 0.199 ± 0.017 | 0.204 ± 0.017 | 0.234 ± 0.018 | 0.207 ± 0.018 | 0.206 ± 0.018 | 0.179 ± 0.017 | 0.193 ± 0.017 | 0.097 ± 0.011 | -             | 0.190 ± 0.021 |
| (aatSE)       | 0.158 ± 0.023 | 0.135 ± 0.021 | 0.178 ± 0.025 | 0.142 ± 0.023 | 0.150 ± 0.023 | 0.100 ± 0.018 | 0.111 ± 0.019 | 0.017 ± 0.007 | -             | 0.021 ± 0.010 |
| I.jap (nutSE) | 0.279 ± 0.021 | 0.294 ± 0.023 | 0.337 ± 0.025 | 0.308 ± 0.025 | 0.304 ± 0.025 | 0.302 ± 0.023 | 0.327 ± 0.025 | 0.286 ± 0.022 | 0.268 ± 0.020 | -             |
| (aatSE)       | 0.228 ± 0.028 | 0.207 ± 0.027 | 0.25 ± 0.03   | 0.207 ± 0.026 | 0.216 ± 0.028 | 0.22 ± 0.029  | 0.237 ± 0.030 | 0.191 ± 0.027 | 0.182 ± 0.026 | -             |

## Additional file 2 (continued).

### Block 3

| Ext-nu DiSE   | L.straminea   | L.hydiana     | A.ligamentina | L.ovata       | H.subangulata | V.ellipsiformis | O.olivaria    | P.fasciolaris | L.rimosus     | C.tampicoensis | G.rotundata   |
|---------------|---------------|---------------|---------------|---------------|---------------|-----------------|---------------|---------------|---------------|----------------|---------------|
| L.str (nutSE) | -             |               |               |               |               |                 |               |               |               |                |               |
| (aatSE)       | -             |               |               |               |               |                 |               |               |               |                |               |
| L.hyd (nutSE) | 0.014 ± 0.006 | -             |               |               |               |                 |               |               |               |                |               |
| (aatSE)       | 0.007 ± 0.007 | -             |               |               |               |                 |               |               |               |                |               |
| A.lig (nutSE) | 0.099 ± 0.016 | 0.105 ± 0.017 | -             |               |               |                 |               |               |               |                |               |
| (aatSE)       | 0.065 ± 0.022 | 0.065 ± 0.022 | -             |               |               |                 |               |               |               |                |               |
| L.ova (nutSE) | 0.238 ± 0.030 | 0.248 ± 0.031 | 0.215 ± 0.027 | -             |               |                 |               |               |               |                |               |
| (aatSE)       | 0.227 ± 0.042 | 0.218 ± 0.040 | 0.227 ± 0.041 | -             |               |                 |               |               |               |                |               |
| H.sub (nutSE) | 0.275 ± 0.031 | 0.283 ± 0.032 | 0.275 ± 0.031 | 0.261 ± 0.032 | -             |                 |               |               |               |                |               |
| (aatSE)       | 0.398 ± 0.058 | 0.398 ± 0.058 | 0.368 ± 0.053 | 0.338 ± 0.052 | -             |                 |               |               |               |                |               |
| V.ell (nutSE) | 0.389 ± 0.042 | 0.374 ± 0.041 | 0.400 ± 0.041 | 0.420 ± 0.053 | 0.401 ± 0.042 | -               |               |               |               |                |               |
| (aatSE)       | 0.619 ± 0.074 | 0.619 ± 0.074 | 0.581 ± 0.070 | 0.568 ± 0.068 | 0.672 ± 0.076 | -               |               |               |               |                |               |
| O.oli (nutSE) | 0.381 ± 0.041 | 0.375 ± 0.041 | 0.352 ± 0.036 | 0.373 ± 0.044 | 0.403 ± 0.044 | 0.124 ± 0.018   | -             |               |               |                |               |
| (aatSE)       | 0.581 ± 0.068 | 0.581 ± 0.068 | 0.544 ± 0.065 | 0.508 ± 0.062 | 0.672 ± 0.076 | 0.159 ± 0.035   | -             |               |               |                |               |
| P.fas (nutSE) | 0.613 ± 0.060 | 0.626 ± 0.063 | 0.650 ± 0.071 | 0.724 ± 0.091 | 0.670 ± 0.070 | 0.659 ± 0.073   | 0.617 ± 0.067 | -             |               |                |               |
| (aatSE)       | 0.993 ± 0.105 | 1.012 ± 0.107 | 1.031 ± 0.110 | 0.993 ± 0.109 | 1.031 ± 0.113 | 1.012 ± 0.110   | 0.956 ± 0.105 | -             |               |                |               |
| L.rim (nutSE) | 0.575 ± 0.063 | 0.571 ± 0.060 | 0.563 ± 0.061 | 0.577 ± 0.072 | 0.514 ± 0.049 | 0.536 ± 0.053   | 0.550 ± 0.060 | 0 ± 0.043     | -             |                |               |
| (aatSE)       | 0.788 ± 0.092 | 0.788 ± 0.092 | 0.804 ± 0.095 | 0.788 ± 0.091 | 0.852 ± 0.097 | 0.788 ± 0.092   | 0.788 ± 0.089 | 0.593 ± 0.074 | -             |                |               |
| C.tam (nutSE) | 0.513 ± 0.059 | 0.509 ± 0.057 | 0.530 ± 0.062 | 0.507 ± 0.058 | 0.541 ± 0.065 | 0.476 ± 0.053   | 0.484 ± 0.058 | 0.533 ± 0.073 | 0.403 ± 0.046 | -              |               |
| (aatSE)       | 0.743 ± 0.084 | 0.743 ± 0.084 | 0.672 ± 0.078 | 0.700 ± 0.081 | 0.788 ± 0.086 | 0.700 ± 0.080   | 0.729 ± 0.081 | 0.773 ± 0.086 | 0.556 ± 0.072 | -              |               |
| G.rot (nutSE) | 0.439 ± 0.045 | 0.431 ± 0.044 | 0.448 ± 0.046 | 0.415 ± 0.046 | 0.508 ± 0.056 | 0.446 ± 0.049   | 0.418 ± 0.047 | 0.530 ± 0.063 | 0.361 ± 0.038 | 0.194 ± 0.027  | -             |
| (aatSE)       | 0.686 ± 0.081 | 0.686 ± 0.081 | 0.645 ± 0.078 | 0.632 ± 0.076 | 0.758 ± 0.084 | 0.632 ± 0.071   | 0.645 ± 0.071 | 0.788 ± 0.087 | 0.497 ± 0.068 | 0.253 ± 0.043  | -             |
| O.ref (nutSE) | 0.534 ± 0.059 | 0.524 ± 0.057 | 0.506 ± 0.053 | 0.539 ± 0.063 | 0.638 ± 0.109 | 0.499 ± 0.057   | 0.509 ± 0.066 | 0.519 ± 0.057 | 0.452 ± 0.049 | 0.336 ± 0.040  | 0.381 ± 0.047 |
| (aatSE)       | 0.729 ± 0.084 | 0.729 ± 0.084 | 0.700 ± 0.082 | 0.700 ± 0.085 | 0.820 ± 0.098 | 0.686 ± 0.077   | 0.743 ± 0.083 | 0.869 ± 0.098 | 0.606 ± 0.075 | 0.508 ± 0.067  | 0.532 ± 0.069 |
| T.liv (nutSE) | 0.510 ± 0.054 | 0.510 ± 0.056 | 0.479 ± 0.050 | 0.476 ± 0.052 | 0.524 ± 0.058 | 0.443 ± 0.044   | 0.451 ± 0.047 | 0.502 ± 0.057 | 0.448 ± 0.050 | 0.252 ± 0.029  | 0.311 ± 0.037 |
| (aatSE)       | 0.659 ± 0.077 | 0.645 ± 0.077 | 0.672 ± 0.079 | 0.619 ± 0.075 | 0.758 ± 0.087 | 0.619 ± 0.076   | 0.659 ± 0.077 | 0.788 ± 0.089 | 0.593 ± 0.073 | 0.318 ± 0.050  | 0.420 ± 0.060 |
| P.pop (nutSE) | 0.643 ± 0.069 | 0.661 ± 0.071 | 0.619 ± 0.066 | 0.573 ± 0.058 | 0.591 ± 0.060 | 0.632 ± 0.066   | 0.618 ± 0.069 | 0.610 ± 0.069 | 0.482 ± 0.045 | 0.460 ± 0.047  | 0.479 ± 0.051 |
| (aatSE)       | 0.758 ± 0.089 | 0.758 ± 0.089 | 0.758 ± 0.088 | 0.729 ± 0.087 | 0.869 ± 0.099 | 0.788 ± 0.088   | 0.820 ± 0.092 | 0.758 ± 0.083 | 0.659 ± 0.080 | 0.581 ± 0.074  | 0.619 ± 0.078 |
| P.dom (nutSE) | 0.744 ± 0.081 | 0.729 ± 0.081 | 0.736 ± 0.093 | 0.710 ± 0.085 | 0.796 ± 0.146 | 0.632 ± 0.067   | 0.728 ± 0.090 | 0.747 ± 0.164 | 0.477 ± 0.049 | 0.455 ± 0.048  | 0.507 ± 0.053 |
| (aatSE)       | 0.852 ± 0.097 | 0.852 ± 0.097 | 0.869 ± 0.098 | 0.869 ± 0.095 | 1.012 ± 0.111 | 0.836 ± 0.098   | 0.885 ± 0.101 | 0.937 ± 0.103 | 0.729 ± 0.088 | 0.593 ± 0.076  | 0.606 ± 0.075 |
| A.pli (nutSE) | 0.649 ± 0.072 | 0.639 ± 0.069 | 0.615 ± 0.060 | 0.597 ± 0.068 | 0.558 ± 0.055 | 0.510 ± 0.050   | 0.523 ± 0.052 | 0.618 ± 0.078 | 0.457 ± 0.053 | 0.377 ± 0.039  | 0.461 ± 0.052 |
| (aatSE)       | 0.804 ± 0.095 | 0.804 ± 0.095 | 0.788 ± 0.094 | 0.758 ± 0.088 | 0.852 ± 0.096 | 0.729 ± 0.086   | 0.773 ± 0.089 | 0.758 ± 0.088 | 0.659 ± 0.086 | 0.497 ± 0.065  | 0.593 ± 0.074 |
| P.sin (nutSE) | 0.623 ± 0.059 | 0.615 ± 0.057 | 0.596 ± 0.057 | 0.621 ± 0.062 | 0.592 ± 0.056 | 0.574 ± 0.058   | 0.606 ± 0.064 | 0.633 ± 0.065 | 0.577 ± 0.062 | 0.531 ± 0.060  | 0.474 ± 0.049 |
| (aatSE)       | 0.836 ± 0.098 | 0.836 ± 0.098 | 0.836 ± 0.097 | 0.836 ± 0.099 | 0.869 ± 0.103 | 0.743 ± 0.089   | 0.820 ± 0.095 | 0.902 ± 0.103 | 0.836 ± 0.094 | 0.714 ± 0.084  | 0.729 ± 0.084 |
| F.flu (nutSE) | 0.666 ± 0.064 | 0.657 ± 0.062 | 0.597 ± 0.056 | 0.700 ± 0.080 | 0.676 ± 0.068 | 0.599 ± 0.058   | 0.640 ± 0.069 | 0.655 ± 0.070 | 0.602 ± 0.065 | 0.638 ± 0.088  | 0.570 ± 0.062 |
| (aatSE)       | 0.836 ± 0.098 | 0.836 ± 0.098 | 0.836 ± 0.098 | 0.836 ± 0.099 | 0.902 ± 0.106 | 0.820 ± 0.095   | 0.885 ± 0.099 | 0.885 ± 0.101 | 0.869 ± 0.098 | 0.773 ± 0.088  | 0.758 ± 0.086 |
| Q.qua (nutSE) | 0.622 ± 0.060 | 0.608 ± 0.058 | 0.603 ± 0.059 | 0.594 ± 0.059 | 0.560 ± 0.054 | 0.568 ± 0.056   | 0.564 ± 0.057 | 0.553 ± 0.054 | 0.551 ± 0.056 | 0.480 ± 0.048  | 0.478 ± 0.049 |
| (aatSE)       | 0.920 ± 0.109 | 0.920 ± 0.109 | 0.869 ± 0.101 | 0.869 ± 0.105 | 0.920 ± 0.108 | 0.869 ± 0.097   | 0.885 ± 0.099 | 0.902 ± 0.102 | 0.836 ± 0.100 | 0.700 ± 0.082  | 0.686 ± 0.084 |
| Q.ref (nutSE) | 0.623 ± 0.059 | 0.609 ± 0.057 | 0.578 ± 0.053 | 0.562 ± 0.053 | 0.587 ± 0.060 | 0.617 ± 0.065   | 0.569 ± 0.057 | 0.597 ± 0.058 | 0.574 ± 0.057 | 0.499 ± 0.052  | 0.489 ± 0.047 |
| (aatSE)       | 0.804 ± 0.098 | 0.804 ± 0.098 | 0.758 ± 0.092 | 0.773 ± 0.094 | 0.836 ± 0.098 | 0.804 ± 0.092   | 0.804 ± 0.092 | 0.869 ± 0.095 | 0.804 ± 0.095 | 0.659 ± 0.079  | 0.645 ± 0.078 |
| I.jap (nutSE) | 0.916 ± 0.140 | 0.887 ± 0.114 | 0.956 ± 0.146 | 0.890 ± 0.107 | 0.989 ± 0.237 | 0.854 ± 0.108   | 0.854 ± 0.108 | 0.783 ± 0.089 | 0.698 ± 0.071 | 0.738 ± 0.081  | 0.715 ± 0.073 |
| (aatSE)       | 1.202 ± 0.129 | 1.179 ± 0.125 | 1.249 ± 0.136 | 1.202 ± 0.133 | 1.274 ± 0.145 | 1.071 ± 0.122   | 1.092 ± 0.124 | 1.012 ± 0.109 | 0.937 ± 0.102 | 0.920 ± 0.104  | 0.937 ± 0.107 |

## Additional file 2 (continued).

### Block 4.

| Ext-nu | DtSE    | O.reflexa     | T.lividus     | P.popei       | P.dombeyanus  | A.plicata     | P.sintoxia    | F.flava       | Q.quadrula    | Q.refulgens   | I.japanensis |
|--------|---------|---------------|---------------|---------------|---------------|---------------|---------------|---------------|---------------|---------------|--------------|
| O.ref  | (nutSE) | -             |               |               |               |               |               |               |               |               |              |
|        | (aatSE) | -             |               |               |               |               |               |               |               |               |              |
| T.liv  | (nutSE) | 0.309 ± 0.036 | -             |               |               |               |               |               |               |               |              |
|        | (aatSE) | 0.463 ± 0.064 | -             |               |               |               |               |               |               |               |              |
| P.pop  | (nutSE) | 0.458 ± 0.047 | 0.396 ± 0.043 | -             |               |               |               |               |               |               |              |
|        | (aatSE) | 0.593 ± 0.072 | 0.568 ± 0.075 | -             |               |               |               |               |               |               |              |
| P.dom  | (nutSE) | 0.514 ± 0.060 | 0.472 ± 0.053 | 0.549 ± 0.062 | -             |               |               |               |               |               |              |
|        | (aatSE) | 0.729 ± 0.089 | 0.568 ± 0.073 | 0.672 ± 0.081 | -             |               |               |               |               |               |              |
| A.pli  | (nutSE) | 0.439 ± 0.048 | 0.394 ± 0.043 | 0.452 ± 0.045 | 0.361 ± 0.040 | -             |               |               |               |               |              |
|        | (aatSE) | 0.593 ± 0.072 | 0.474 ± 0.064 | 0.581 ± 0.073 | 0.508 ± 0.070 | -             |               |               |               |               |              |
| P.sin  | (nutSE) | 0.475 ± 0.048 | 0.483 ± 0.052 | 0.540 ± 0.054 | 0.492 ± 0.055 | 0.356 ± 0.038 | -             |               |               |               |              |
|        | (aatSE) | 0.659 ± 0.081 | 0.606 ± 0.077 | 0.645 ± 0.080 | 0.556 ± 0.070 | 0.398 ± 0.058 | -             |               |               |               |              |
| F fla  | (nutSE) | 0.492 ± 0.049 | 0.551 ± 0.064 | 0.595 ± 0.067 | 0.465 ± 0.047 | 0.367 ± 0.038 | 0.108 ± 0.017 | -             |               |               |              |
|        | (aatSE) | 0.632 ± 0.079 | 0.632 ± 0.076 | 0.645 ± 0.079 | 0.581 ± 0.070 | 0.398 ± 0.057 | 0.058 ± 0.021 | -             |               |               |              |
| Q.qua  | (nutSE) | 0.434 ± 0.042 | 0.453 ± 0.047 | 0.470 ± 0.046 | 0.487 ± 0.053 | 0.363 ± 0.035 | 0.339 ± 0.037 | 0.355 ± 0.038 | -             |               |              |
|        | (aatSE) | 0.659 ± 0.079 | 0.632 ± 0.075 | 0.672 ± 0.087 | 0.632 ± 0.078 | 0.497 ± 0.069 | 0.398 ± 0.063 | 0.409 ± 0.063 | -             |               |              |
| Q.ref  | (nutSE) | 0.474 ± 0.045 | 0.495 ± 0.053 | 0.486 ± 0.049 | 0.492 ± 0.058 | 0.418 ± 0.045 | 0.325 ± 0.035 | 0.361 ± 0.038 | 0.119 ± 0.019 | -             |              |
|        | (aatSE) | 0.645 ± 0.079 | 0.619 ± 0.075 | 0.632 ± 0.081 | 0.581 ± 0.072 | 0.486 ± 0.066 | 0.398 ± 0.060 | 0.420 ± 0.061 | 0.072 ± 0.024 | -             |              |
| I.jap  | (nutSE) | 0.693 ± 0.068 | 0.873 ± 0.113 | 0.851 ± 0.142 | 0.638 ± 0.064 | 0.658 ± 0.068 | 0.611 ± 0.065 | 0.635 ± 0.066 | 0.572 ± 0.057 | 0.539 ± 0.054 | -            |
|        | (aatSE) | 1.071 ± 0.115 | 0.956 ± 0.103 | 0.937 ± 0.101 | 0.804 ± 0.090 | 0.869 ± 0.094 | 0.788 ± 0.088 | 0.836 ± 0.093 | 0.820 ± 0.099 | 0.773 ± 0.093 | -            |
