# Supplementary material for: Extreme primary and secondary protein structure variability in the chimeric male-transmitted cytochrome c oxidase subunit II protein in freshwater mussels: Evidence for an elevated amino acid substitution rate in the face of domain-specific purifying selection
Source: PubMed Central journal article supplement (PMC2430956; doi:10.1186/1471-2148-8-165), 2008-05-31
Supplement: 1471-2148-8-165-S3.pdf [file 1471-2148-8-165-S3.pdf]

**Additional Table 3.** *Codeml* log-likelihood values and parameter estimates for four models applied to the M and F *COX2-COX1* regions.

---

Male sequences (*COX2h+COX2e+COX1*):

---

| Model                | No. of parameters | $\chi^2$ | $\ln L$   | Parameter estimates                                                                                                                       |
|----------------------|-------------------|----------|-----------|-------------------------------------------------------------------------------------------------------------------------------------------|
| M1a (nearly neutral) | 2                 | 6.48     | -12935.84 | $\hat{p}_0 = 0.853$ ; $\hat{p}_1 = 0.147$ ; $\hat{\omega}_0 = 0.046$ ; $\hat{\omega}_1 = 1$                                               |
| M2a (selection)      | 4                 | 6.48     | -12935.84 | $\hat{p}_0 = 0.853$ ; $\hat{p}_1 = 0.054$ ; $\hat{p}_2 = 0.093$<br>$\hat{\omega}_0 = 0.045$ ; $\hat{\omega}_1 = 1$ ; $\hat{\omega}_2 = 1$ |
| M7(beta)             | 2                 | 6.02     | -12609.68 | $\hat{p} = 0.294$ ; $\hat{q} = 2.823$                                                                                                     |
| M8 (beta & $w > 1$ ) | 4                 | 11.76    | -12604.03 | $\hat{p}_0 = 0.981$ ; $\hat{p} = 0.329$ ; $\hat{q} = 3.987$<br>$\hat{p}_1 = 0.019$ ; $\hat{\omega} = 1.000$                               |

---

Female sequences (*COX2h+COX1*):

---

| Model                | No. of parameters | $\chi^2$ | $\ln L$  | Parameter estimates                                                                                                                            |
|----------------------|-------------------|----------|----------|------------------------------------------------------------------------------------------------------------------------------------------------|
| M1a (nearly neutral) | 2                 | 11.49    | -5727.65 | $\hat{p}_0 = 0.979$ ; $\hat{p}_1 = 0.021$ ; $\hat{\omega}_0 = 0.007$ ; $\hat{\omega}_1 = 1$                                                    |
| M2a (selection)      | 4                 | 11.49    | -5727.65 | $\hat{p}_0 = 0.979$ ; $\hat{p}_1 = 0.021$ ; $\hat{p}_2 = 0.000$<br>$\hat{\omega}_0 = 0.007$ ; $\hat{\omega}_1 = 1$ ; $\hat{\omega}_2 = 35.887$ |
| M7(beta)             | 2                 | 11.81    | -5700.71 | $\hat{p} = 0.081$ ; $\hat{q} = 3.033$                                                                                                          |
| M8 (beta & $w > 1$ ) | 4                 | 11.76    | -5690.24 | $\hat{p}_0 = 0.994$ ; $\hat{p} = 0.110$ ; $\hat{q} = 8.522$<br>$\hat{p}_1 = 0.007$ ; $\hat{\omega} = 1.000$                                    |

---
