# Supplementary material for: Extreme primary and secondary protein structure variability in the chimeric male-transmitted cytochrome c oxidase subunit II protein in freshwater mussels: Evidence for an elevated amino acid substitution rate in the face of domain-specific purifying selection
Source: PubMed Central journal article supplement (PMC2430956; doi:10.1186/1471-2148-8-165), 2008-05-31
Supplement: 1471-2148-8-165-S4.pdf [file 1471-2148-8-165-S4.pdf]

**Additional Table 4.** Summary of TreeSAAP output showing the 31 amino acid properties of *MCOX2h+MCOX1*, *MCOX2e* and *FCOX2h+MCOX1*. Absence of selection implies neutrality.

| Amino Acid Property                       | M sequences |            | <i>MCOX2</i> extension |            | F sequences |            |
|-------------------------------------------|-------------|------------|------------------------|------------|-------------|------------|
|                                           | 1 - 3       | 6 - 8      | 1 - 3                  | 6 - 8      | 1 - 3       | 6 - 8      |
| Alpha-helical tendencies                  |             |            |                        |            |             | neg/destab |
| Average number of surrounding residues    |             | neg/destab |                        | neg/destab |             | neg/destab |
| Beta-structure tendencies                 | neg/stab    | neg/destab |                        | neg/destab |             |            |
| Bulkiness                                 |             | neg/destab |                        |            | neg/stab    | neg/destab |
| Buriedness                                | pos/stab    | neg/destab |                        | neg/destab |             | neg/destab |
| Chromatographic index                     |             | neg/destab | pos/stab               | neg/destab |             | neg/destab |
| Coil tendencies                           |             | neg/destab |                        | neg/destab |             | neg/destab |
| Composition                               |             | neg/destab |                        |            |             |            |
| Compressibility                           | neg/stab    |            |                        | neg/destab | neg/stab    |            |
| Equilibrium constant (ionization of COOH) | neg/stab    | neg/destab | neg/stab               | neg/destab | neg/stab    |            |
| Helical contact area                      |             | neg/destab | pos/stab               | neg/destab |             | pos/destab |
| Hydropathy                                |             | neg/destab |                        | neg/destab | neg/stab    | neg/destab |
| Isoelectric point                         | neg/stab    |            | neg/stab               |            |             |            |
| Long-range non-bonded energy              |             | neg/destab |                        | neg/destab |             | neg/destab |
| Mean r.m.s. fluctuation displacement      | neg/stab    | neg/destab |                        | neg/destab | pos/stab    | neg/destab |
| Molecular volume                          | pos/stab    | neg/destab | pos/stab               |            |             |            |
| Molecular weight                          |             | neg/destab |                        | neg/destab |             |            |
| Normalized consensus hydrophobicity       |             | neg/destab |                        | neg/destab | neg/stab    |            |
| Partial specific volume                   |             | neg/destab | pos/stab               | neg/destab |             | pos/destab |
| Polar requirement                         |             | neg/destab |                        | neg/destab | pos/stab    | neg/destab |
| Polarity                                  |             | neg/destab | pos/stab               | neg/destab | pos/stab    | neg/destab |
| Power to be at the C-terminal             | neg/stab    | neg/destab |                        | neg/destab |             | neg/destab |
| Power to be at the middle of alpha-helix  | pos/stab    | neg/destab | pos/stab               | neg/destab |             |            |
| Power to be at the N-terminal             | neg/stab    | neg/destab |                        | neg/destab |             | neg/destab |
| Refractive index                          | neg/stab    | neg/destab | pos/stab               | neg/destab | neg/stab    |            |
| Short and medium range non-bonded energy  |             | neg/destab |                        | neg/destab | neg/stab    |            |
| Solvent accessible reduction ratio        |             | neg/destab |                        | neg/destab |             | neg/destab |
| Surrounding hydrophobicity                | neg/stab    |            |                        |            | neg/destab  |            |
| Thermodynamic transfer hydrophobicity     |             | neg/destab | pos/stab               | neg/destab |             | neg/destab |
| Total non-bonded energy                   | neg/stab    | neg/destab | pos/stab               | neg/destab | pos/stab    |            |
| Turn tendencies                           |             | neg/destab |                        | neg/destab |             | neg/destab |
